# Supplementary material
Source: PubMed Central journal article supplement (PMC4187859)
Supplement: IAI.01615-14_zii999090866so3.pdf [file IAI.01615-14_zii999090866so3.pdf]

## Supplementary Table 1

| Strain        | CD40 MFI | Level of induction |
|---------------|----------|--------------------|
| Mock-infected | 15.3     | n/a                |
| S23           | 27.3     | low                |
| CL12          | 28.8     | low                |
| E7            | 33.8     | low                |
| STC7          | 34.2     | low                |
| S30           | 35.7     | low                |
| STH1          | 35.8     | low                |
| STH10         | 36.5     | low                |
| CL16          | 36.5     | low                |
| CL13          | 37.8     | low                |
| CL18          | 38.8     | low                |
| C96AS         | 41.8     | low                |
| S2T           | 41.9     | low                |
| S22+LC37      | 53.7     | medium             |
| C96C12        | 57.9     | medium             |
| STF3          | 58.5     | medium             |
| B4            | 78       | medium             |
| CL29          | 103      | high               |
| STE10         | 108      | high               |
| STG4          | 192      | high               |

**Supplementary Table 1. Recombinant type II x III progeny induction of CD40.** BMdM were mock-infected or infected with each of the progeny strains listed, stained with anti-CD40 mAbs, and examined by flow cytometry. The mean fluorescence intensity (MFI) values for CD40 on mock and infected samples are listed and were used to identify strains that highly induced CD40 expression on the cell surface.
