# Supplementary material
Source: PubMed Central journal article supplement (PMC4187859)
Supplement: IAI.01615-14_zii999090866so4.pdf [file IAI.01615-14_zii999090866so4.pdf]

## Legends for Supplementary Figures and Table

### **Supplementary Figure 1. CD40 expression on type II *T. gondii*-infected splenocytes.**

Splenocytes from C57BL/6 mice were mock-infected or infected with type II parasites and stained for CD40 expression at 18 hpi. CD40 levels on (A) CD11c<sup>+</sup> or (C) CD19<sup>+</sup> cells that were mock-infected, infected (GFP<sup>+</sup>), or bystander cells (GFP<sup>-</sup>). (B and D) The average CD40 mean fluorescence intensity (MFI) and standard deviation from three independent experiments for CD11c<sup>+</sup> (B) or CD19<sup>+</sup> (D) cells. \*, P<0.05 (Student's t-test).

### **Supplementary Figure 2. Expression of CD40 during *T. gondii* infection.**

BMdM were mock-infected or infected with either the *Prugnialud* or ME49 *T. gondii* tachyzoites. The cells were harvested at 18 hpi and analyzed for CD40 levels by flow cytometry. One representative set from at least three independent experiments is shown.

### **Supplementary Table 1. Recombinant type II x III progeny induction of**

**CD40.** BMdM were mock-infected or infected with each of the progeny strains listed, stained with anti-CD40 mAbs, and examined by flow cytometry. The mean fluorescence intensity (MFI) values for CD40 on mock and infected samples are listed and were used to identify strains that highly induced CD40 expression on the cell surface.
