# Supplementary material
Source: PubMed Central journal article supplement (PMC4187859)

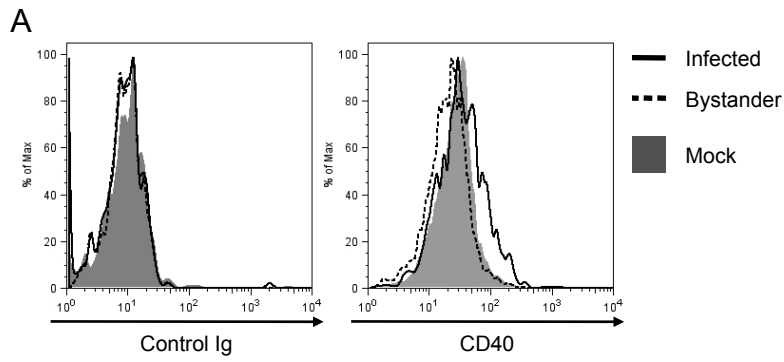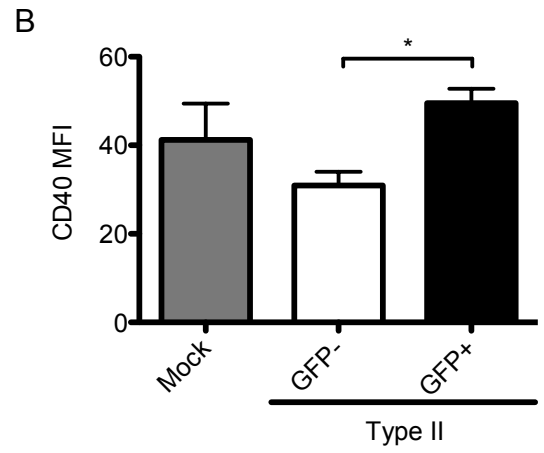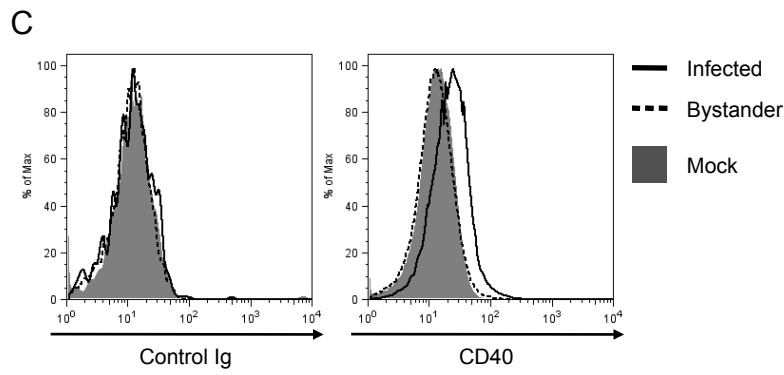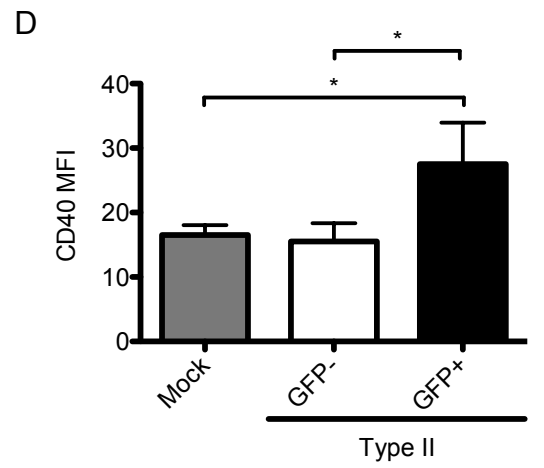

Supplement: IAI.01615-14_zii999090866so1.pdf [file IAI.01615-14_zii999090866so1.pdf]

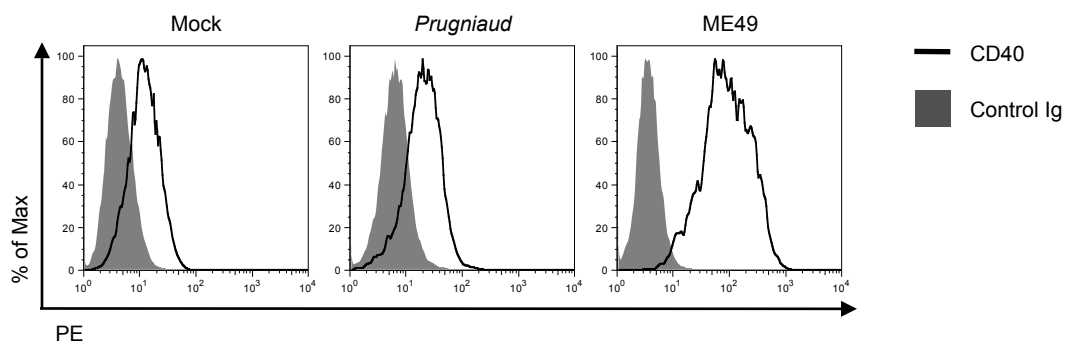

Supplement: IAI.01615-14_zii999090866so2.pdf [file IAI.01615-14_zii999090866so2.pdf]
